# Supplementary material for: Tocilizumab, netakimab, and baricitinib in patients with mild-to-moderate COVID-19: An observational study
Source: PubMed Central journal article supplement (PMC9401152; doi:10.1371/journal.pone.0273340), 2022-08-24

**A**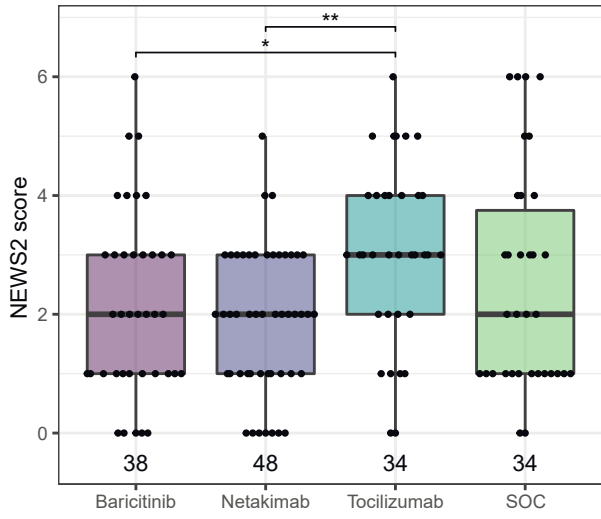**B**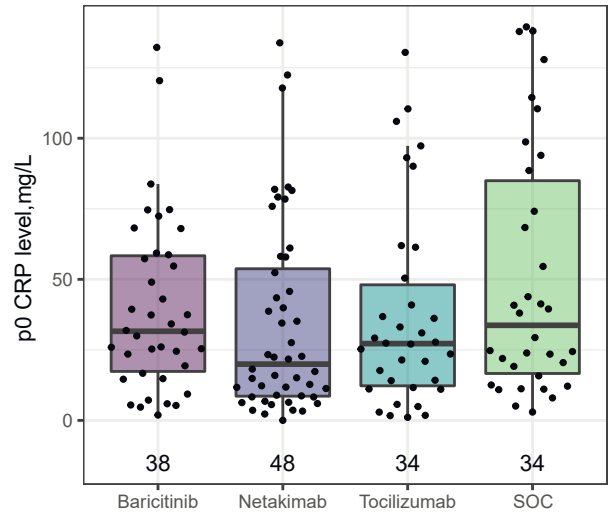**C**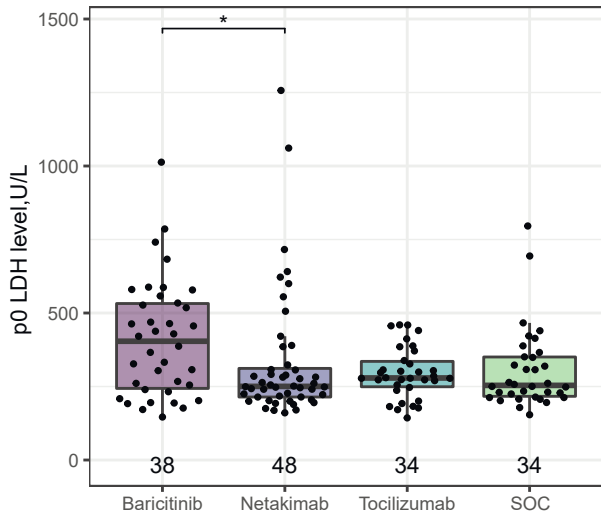**D**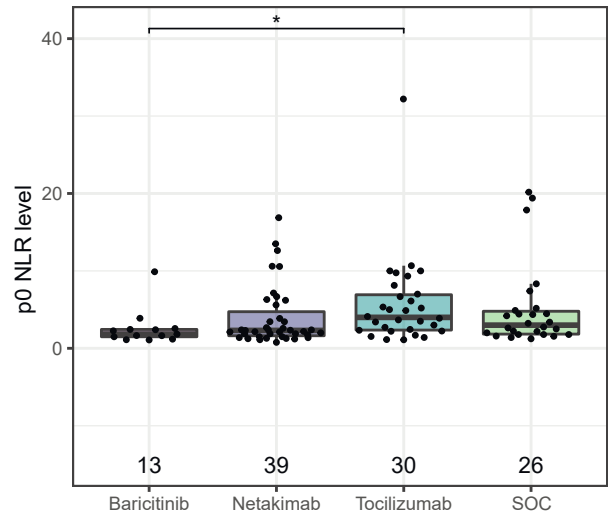

Supplement: pone.0273340.s001.pdf [file pone.0273340.s001.pdf]
