# Supplementary material for: Tocilizumab, netakimab, and baricitinib in patients with mild-to-moderate COVID-19: An observational study
Source: PubMed Central journal article supplement (PMC9401152; doi:10.1371/journal.pone.0273340), 2022-08-24
Supplement: pone.0273340.s004.pdf [file pone.0273340.s004.pdf]

**S1 Table.** Clinical characteristics of patients from the  $\Delta 0-72$  h and  $\Delta 0-120$  h groups.

|                               | Baricitinib                      | Netakimab                          | Tocilizumab                       | SOC                       | p-value                                                                                        |
|-------------------------------|----------------------------------|------------------------------------|-----------------------------------|---------------------------|------------------------------------------------------------------------------------------------|
| 0-72 hours                    |                                  |                                    |                                   |                           |                                                                                                |
| n, CRP                        | 24                               | 45                                 | 33                                | 32                        |                                                                                                |
| CRP<br>0 h median<br>(IQR)    | 28<br>(13.28–57.65)              | 17.34<br>(8.32–52.36)              | 27.39<br>(14.09–50.44)            | 27.05<br>(14.98–89.91)    | >0.05 $\Delta$<br>$8 \times 10^{-4} \ddagger$<br>$1 \times 10^{-5} \#$<br>>0.05 $\blacksquare$ |
| CRP<br>72 h median<br>(IQR)   | 17.09<br>(7.93–25.76)            | <b>7.89</b><br><b>(4.09–14.87)</b> | <b>6.6</b><br><b>(2.81–12.67)</b> | 23.34<br>(13.47–54.16)    |                                                                                                |
| n, LDH                        | 18                               | 39                                 | 29                                | 22                        |                                                                                                |
| LDH<br>0 h median<br>(IQR)    | 327<br>(220.45–491.5)            | 247.6<br>(209.45–298.8)            | 286<br>(272.6–371.1)              | 282.25<br>(216.47–350.4)  | >0.05 $\Delta$<br>0.029 $\ddagger$<br>>0.05 $\#$<br>>0.05 $\blacksquare$                       |
| LDH<br>72 h median<br>(IQR)   | 332.8<br>(208.3–448.5)           | 210<br>(174.8–250.1)               | 291.3<br>(241–356.8)              | 253.65<br>(210.32–320.15) |                                                                                                |
| n, ANC, ALC,<br>NLR           | 26                               | 46                                 | 34                                | 32                        |                                                                                                |
| ANC<br>0 h median<br>(IQR)    | 5.05<br>(2.8–7.06)               | 3.05<br>(1.92–4.95)                | 3.25<br>(2.25–4.47)               | 4.2<br>(2.85–6.47)        | >0.05 $\Delta$<br>0.0006408 $\ddagger$<br>0.02806 $\#$<br>>0.05 $\blacksquare$                 |
| ANC<br>72 h median<br>(IQR)   | 3.21<br>(2.05–5.41)              | <b>5.4</b><br><b>(3.05–8.27)</b>   | <b>2</b><br><b>(1.42–3.87)</b>    | 3.9<br>(2.7–4.77)         |                                                                                                |
| ALC<br>0 h median<br>(IQR)    | 1.65<br>(1.08–2.,7)              | 1<br>(0.72–1.6)                    | 1.05<br>(0.62–1.37)               | 1.2<br>(0.87–1.52)        | 0.01274 $\Delta$<br>>0.05 $\ddagger$<br>>0.05 $\#$<br>>0.05 $\blacksquare$                     |
| ALC<br>72 h median<br>(IQR)   | <b>2.65</b><br><b>(1.9–3.39)</b> | 1.15<br>(0.75–1.4)                 | 1.1<br>(0.8–1.4)                  | 1.3<br>(0.97–1.62)        |                                                                                                |
| NLR<br>0 h median<br>(IQR)    | 2.41<br>(1.64–4.11)              | 2.32<br>(1.77–5.46)                | 3.93<br>(2.35–6.52)               | 3.3<br>(1.94–5.64)        | 0.009367 $\Delta$<br>0.00608 $\ddagger$<br>0.01416 $\#$<br>>0.05 $\blacksquare$                |
| NLR<br>72 h median<br>(IQR)   | <b>1.18</b><br><b>(0.8–1.68)</b> | <b>5.26</b><br><b>(2.36–7.59)</b>  | 2.05<br>(0.94–5)                  | 2.75<br>(1.56–4.8)        |                                                                                                |
| n, NEWS2                      | 38                               | 48                                 | 34                                | 34                        |                                                                                                |
| NEWS2<br>0 h median<br>(IQR)  | 2<br>(1–3)                       | 2<br>(1–3)                         | 3<br>(2–4)                        | 2<br>(1–3.75)             | 0.0432 $\Delta$<br>0.0104 $\ddagger$<br>0.0000684 $\#$<br>>0.05 $\blacksquare$                 |
| NEWS2<br>72 h median<br>(IQR) | 1<br>(0–2.75)                    | 1<br>(0–2)                         | 2<br>(1–2)                        | 1<br>(1–2)                |                                                                                                |

| 0–120 hours                    |                                   |                                   |                                   |                                    |                                                                                             |
|--------------------------------|-----------------------------------|-----------------------------------|-----------------------------------|------------------------------------|---------------------------------------------------------------------------------------------|
| n, CRP                         | 23                                | 38                                | 32                                | 30                                 |                                                                                             |
| CRP<br>0 h median<br>(IQR)     | 31.89<br>(21.45–51.85)            | 19.95<br>(8.69–45.14)             | 27.22<br>(11.52–43.3)             | 34.43<br>(13.36–92.59)             | 1.2 x 10 <sup>-4</sup> △<br>6.3 x 10 <sup>-7</sup> ‡<br>1.9 x 10 <sup>-7</sup> #<br>0.003 ■ |
| CRP<br>120 h median<br>(IQR)   | <b>6.7</b><br><b>(3.71–11.06)</b> | <b>4.84</b><br><b>(1.99–7.85)</b> | <b>2.64</b><br><b>(1.11–5.70)</b> | <b>12.13</b><br><b>(8.5–25.38)</b> |                                                                                             |
| n, LDH                         | 15                                | 33                                | 25                                | 19                                 |                                                                                             |
| LDH<br>0 h median<br>(IQR)     | 332.5<br>(249.8–523.7)            | 247.6<br>(214.3–291.2)            | 286<br>(272.8–371.1)              | 257.3<br>(209.8–321)               | >0.05 △<br>>0.05 ‡<br>>0.05 #<br>>0.05 ■                                                    |
| LDH<br>120 h median<br>(IQR)   | 401.3<br>(208.6–526.5)            | 212.9<br>(184.9–267.3)            | 274.4<br>(226.6–339.4)            | 246.8<br>(204.35–293.9)            |                                                                                             |
| n, ANC, ALC,<br>NLR            | 19                                | 38                                | 31                                | 28                                 |                                                                                             |
| ANC<br>0 h median<br>(IQR)     | 3.9<br>(2.5–6.34)                 | 3<br>(1.95–4.35)                  | 3.2<br>(2.25–4.45)                | 3.95<br>(2.7–5.52)                 | >0.05 △<br>6.9 x 10 <sup>-6</sup> ‡<br>>0.05 #<br>>0.05 ■                                   |
| ANC<br>120 h median<br>(IQR)   | 3.37<br>(2.65–4.18)               | <b>6.2</b><br><b>(4.6–7.55)</b>   | 3.4<br>(2.25–4.5)                 | 3.95<br>(2.27–5.22)                |                                                                                             |
| ALC<br>0 h median<br>(IQR)     | 1.6<br>(1.14–2.59)                | 1<br>(0.7–1.6)                    | 1<br>(0.6–1.4)                    | 1.2<br>(0.9–1.52)                  | 0.03108 △<br>>0.05 ‡<br>>0.05 #<br>>0.05 ■                                                  |
| ALC<br>120 h median<br>(IQR)   | <b>2.4</b><br><b>(2.05–3.47)</b>  | 1.2<br>(1–1.6)                    | 1.3<br>(0.8–1.81)                 | 1.2<br>(0.9–1.8)                   |                                                                                             |
| NLR<br>0 h median<br>(IQR)     | 2.25<br>(1.56–3.21)               | 2.31<br>(1.62–4.73)               | 4.09<br>(2.38–6.83)               | 2.99<br>(1.94–4.94)                | 4.37 x 10 <sup>-5</sup> △<br>0.008684 ‡<br>>0.05 #<br>>0.05 ■                               |
| NLR<br>120 h median<br>(IQR)   | <b>1.36</b><br><b>(0.91–1.88)</b> | <b>5.13</b><br><b>(2.57–6.98)</b> | 2.79<br>(1.34–6.2)                | 2.19<br>(1.83–5.53)                |                                                                                             |
| n, NEWS                        | 38                                | 48                                | 34                                | 34                                 |                                                                                             |
| NEWS2<br>0 h median<br>(IQR)   | 2<br>(1–3)                        | 2<br>(1–3)                        | 3<br>(2–4)                        | 2<br>(1–3.75)                      | 0.00046 △<br>0.00102 ‡<br>0.000086 #<br>>0.05 ■                                             |
| NEWS2<br>120 h median<br>(IQR) | 1<br>(0–1)                        | 1<br>(0–2)                        | 1<br>(0–2)                        | 1<br>(1–3)                         |                                                                                             |

Data are median (IQR), where IQR = interquartile range; CRP = C-reactive protein (mg/L); LDH = lactic dehydrogenase (IU/L); ANC = absolute neutrophil count (x 10<sup>9</sup>/L); ALC = absolute lymphocyte count (x 10<sup>9</sup>/L); NLR = neutrophil-to-lymphocyte ratio; NEWS2 = National Early Warning Score 2; n = number of patients with corresponding data. P values were calculated using Kruskal-Wallis and Dunn test, △ = p-value for Baricitinib group, ‡ = p-value for Netakimab group, # = p-value for Tocilizumab group, ■ = p-value for SOC group. P-values that do not significantly differ are shown as p >0.05.
