# Supplementary material for: Tocilizumab, netakimab, and baricitinib in patients with mild-to-moderate COVID-19: An observational study
Source: PubMed Central journal article supplement (PMC9401152; doi:10.1371/journal.pone.0273340), 2022-08-24
Supplement: pone.0273340.s005.pdf [file pone.0273340.s005.pdf]

**S2 Table.** Clinical characteristics of patients at three different timepoints.

|                           | Baricitinib                    | Netakimab                         | Tocilizumab                       | SOC                    |
|---------------------------|--------------------------------|-----------------------------------|-----------------------------------|------------------------|
| n, CRP                    | 10                             | 35                                | 28                                | 25                     |
| CRP 0 h<br>median (IQR)   | 31.89<br>(14.6–72.4)           | 17.76<br>(8.59–44.01)             | 27.39<br>(12.87–45.68)            | 27<br>(14.98–95.13)    |
| CRP 72 h<br>median (IQR)  | 18.46<br>(4.34–37.93)          | <b>7.9</b><br><b>(3.98–12.55)</b> | <b>6.48</b><br><b>(2.52–12.4)</b> | 23.6<br>(16.09–67.23)  |
| CRP 120 h<br>median (IQR) | 5.73<br>(2.1–6.7)              | <b>4.72</b><br><b>(1.96–6.95)</b> | <b>2.7</b><br><b>(0.98–5.75)</b>  | 12.13<br>(8.44–27.34)  |
| n, LDH                    | 6                              | 31                                | 24                                | 12                     |
| LDH 0 h<br>median (IQR)   | 267.3<br>(213.05–319.9)        | 245.9<br>(214.25–286.8)           | 280<br>(272.6–371.1)              | 257.3<br>(212.5–319.2) |
| LDH 72 h<br>median (IQR)  | 221.2<br>(181.65–383.75)       | 211.6<br>(182.7–244.9)            | 285<br>(238.5–336)                | 251.6<br>(120.1–265.7) |
| LDH 120 h<br>median (IQR) | 217.7<br>(175.7–314.15)        | 210.1<br>(183.95–240.25)          | 274.4<br>(226.6–351.2)            | 248.6<br>(201.6–298)   |
| n, ANC, ALC, NLR          | 13                             | 39                                | 30                                | 26                     |
| ANC 0 h<br>median (IQR)   | 2.8<br>(2.2–3.9)               | 3<br>(1.95–4.35)                  | 3.4<br>(2.22–4.3)                 | 3.95<br>(2.7–5.97)     |
| ANC 72 h<br>median (IQR)  | 2.2<br>(1.8–2.9)               | <b>5.3</b><br><b>(2.9–8.4)</b>    | 2.1<br>(1.35–4.12)                | 3.65<br>(2.62–4.82)    |
| ANC 120 h<br>median (IQR) | 2.9<br>(2.2–3.37)              | <b>6.2</b><br><b>(4.6–7.55)</b>   | 3.45<br>(2.47–4.7)                | 3.65<br>(2.22–5.67)    |
| ALC 0 h<br>median (IQR)   | 1.5<br>(0.92–1.9)              | 1<br>(0.7–1.5)                    | 0.95 (<br>0.6–1.4)                | 1.2<br>(0.9–1.57)      |
| ALC 72 h<br>median (IQR)  | <b>2.3</b><br><b>(1.9–3.2)</b> | 1.2<br>(0.75–1.4)                 | 1.05<br>(0.72–1.3)                | 1.35<br>(1–1.9)        |
| ALC 120 h<br>median (IQR) | <b>2.2</b><br><b>(2–2.4)</b>   | 1.2<br>(1–1.6)                    | 1.3<br>(0.8–1.8)                  | 1.15<br>(0.9–1.75)     |
| NLR 0 h<br>median (IQR)   | 2.4<br>(1.48–3.87)             | 2.32<br>(1.58–3.75)               | 3.99<br>(2.35–6.91)               | 2.56<br>(1.77–6.29)    |
| NLR 72 h<br>median (IQR)  | 1.31<br>(0.96–2.44)            | <b>4.85</b><br><b>(2.44–8.12)</b> | 2.81<br>(1.04–5.04)               | 2.75<br>(1.63–6.75)    |
| NLR 120 h<br>median (IQR) | 1.57<br>(1.16–2.07)            | <b>5.2</b><br><b>(2.26–7.07)</b>  | 2.89<br>(1.38–6.3)                | 3.41<br>(1.92–5.9)     |

Data are median (IQR), where IQR = interquartile range; CRP = C-reactive protein (mg/L); LDH = lactic dehydrogenase (IU/L); ANC = absolute neutrophil count ( $\times 10^9/L$ ); ALC = absolute lymphocyte count ( $\times 10^9/L$ ); NLR = neutrophil-to-lymphocyte ratio; n = number of patients with data available.
